# Supplementary material
Source: publisher site journal article supplement (https://www.dovepress.com/article/541390)
Supplement: Supplementary file 1 [file 541390_supporting%20information_3.docx]

**Supplementary Information**

**7-hydroxyethyl chrysin alleviates high altitude pulmonary edema via activation of the PI3K/AKT signaling pathway**

Gege Wang1,2, Ning Wang2, Yu Xin1,2, Huiping Ma2, Linlin Jing1

1Department of Pharmacy, The First Affiliated Hospital of Xi'an Jiaotong University, Xi'an, Shaanxi, People’s Republic of China.

2Department of Pharmacy, The 940th Hospital of Joint Logistics Support force of PLA, Lanzhou, Gansu, People’s Republic of China

**Correspondence**

**Linlin Jing,** Department of Pharmacy, The First Affiliated Hospital of Xi'an Jiaotong University, NO.277 Yanta West Road, Yanta District, Xi’an, Shaanxi, 710061, People’s Republic of China.

E-mail address: jinglinlin@xjtufh.edu.cn

**Huiping Ma**, Department of pharmacy, The 940th Hospital of Joint Logistics Support force of PLA, NO.333 Binhe South Road, Qilihe District, Lanzhou, 730050, Gansu, People’s Republic of China*.* E-mail addresses: huipingmacyk@163.com

**Table S1** Solubility of 7-HCE in different solvents (mg/mL)

| Sol  Com | Water | Acetonitrile | Ethyl alcohol | Methanol | Ethyl acetate | Chloroform | DMSO |
| --- | --- | --- | --- | --- | --- | --- | --- |
| **Chrysin** | 3.84×10-5 | 1.34 | 3.69 | 1.91 | 3.33 | 0.37 | 287.58 |
| **7-HEC** | 2.45×10-3 | 2.25 | 4.00 | 2.93 | 5.83 | 1.04 | 539.54 |

**Table S2.** Reagent Sources

| Reagent/Resource | Source | Lot No |
| --- | --- | --- |
| **Commercial Assays Kits** | Nanjing Jiancheng Bioengineering Institute |  |
| Bicinchoninic Acid Assay (BCA) | 20160710 |
| Malonaldehyde (MDA) | 20160721 |
| Superoxide dismutase (SOD) | 20160718 |
| Hydrogen peroxide (H2O2) | 20160819 |
| Glutathione peroxidase (GSH-Px) | 20160811 |
| Myeloperoxidase (MPO) | 20160720 |
| Glutathione (GSH) | 20160715 |
| Catalase (CAT) | 20160822 |
| Total antioxidant capacity (T-AOC) | 20160706 |
| Glutathione S-transferases (GST) | 20160808 |
| Pyruvate kinase (PK) | 20160721 |
| Pyruvic acid | 20160721 |
| Nitric oxide (NO) | 20160707 |
| Lactate dehydrogenase (LDH) | 20160711 |
| Lactate (LD) | 20160722 |
| ATP | 20160719 |
| ATPase | 20160823 |
| **ELISA Kits** |  |  |
| Tumor necrosis factor alpha (TNF-α) | Shanghai Fengxiang Biological Technology Co., Ltd | 20160611 |
| Interleukin-1*β* (IL-1β) | 20160621 |
| Interleukin-6(IL-6) | 20160704 |
| Endothelial nitric oxide synthase (eNOS) | 20160510 |
| Endothelin-1 (ET-1) | 20160515 |
| Soluble vascular cell adhesion Molecule-1 (sVCAM-1) | 20160501 |
| Soluble intercellular adhesion molecule-1 (slCAM-1) | 20160522 |
| **Antibodies** |  |  |
| p-NF-κB p65 | Cell Signaling Technology | 17 |
| NF-κB p65 | Abcam | 1034098-1 |
| AQP1 | Proteintech | 00099337 |
| Occludin | Abcam | GR3243495-10 |
| VEGF | Affinity Biosciences | 83m8093 |
| p-PI3K | Cell Signaling Technology | 4228T(7) |
| PI3K | Cell Signaling Technology | 4292S(12) |
| p-AKT | Cell Signaling Technology | 9271S(15) |
| AKT | Cell Signaling Technology | 9272S(30) |
| *β*-actin | ZSGB-BIO | 230090801 |
| HRP-labeled Goat Anti-Mouse IgG | Proteintech | 20000484 |
| HRP-labeled Goat Anti-Rabbit IgG | Proteintech | 20000486 |

**Table S3.** The molecular docking range parameters of hub targets

| Gene names | PDB ID | Molecular docking range parameters | Gene names | PDB ID | Molecular docking range parameters |
| --- | --- | --- | --- | --- | --- |
| TNF | 7jra | center_x = -6.717  center_y = -1.716  center_z = -29.488  size_x = 25.0  size_y = 25.0  size_z = 25.0 | EGFR | 8po4 | center_x = 44.868  center_y = -17.298  center_z = 18.698  size_x = 23.8888888889  size_y = 23.8888888889  size_z = 23.8888888889 |
| HIF1A | AF-Q16665-F1 | center_x = 5.775  center_y = -1.877  center_z = 5.682  size_x = 40.0  size_y = 40.0  size_z = 40.0 | HSP90AA1 | 7s9h | center_x = 33.496  center_y = 14.519  center_z = -20.479  size_x = 40.0  size_y = 40.0  size_z = 40.0 |
| MMP9 | 8k5v | center_x = 22.286  center_y = 2.038  center_z = -9.846  size_x = 25.4444444444  size_y = 25.4444444444  size_z = 25.4444444444 | ESR1 | 2qxs | center_x = 35.721  center_y = 6.009  center_z = 20.263  size_x = 40.0  size_y = 40.0  size_z = 40.0 |
| NFKB1 | 8tqd | center_x = 13.14  center_y = 6.959  center_z = -0.607  size_x = 40.0  size_y = 40.0  size_z = 40.0 | PPARG | 3u9q | center_x = 8.912  center_y = -1.052  center_z = 13.086  size_x = 30.1111111111  size_y = 30.1111111111  size_z = 30.1111111111 |
| HSP90AB1 | 6n8y | center_x = -0.78  center_y = -14.625  center_z = -27.539  size_x = 24.7777777778  size_y = 24.7777777778  size_z = 24.7777777778 |  |  |  |
